# Supplementary material for: Phylogeny, Virulence, and Antimicrobial Resistance Gene Profiles of Enterococcus faecium Isolated from Australian Feedlot Cattle and Their Significance to Public and Environmental Health
Source: MDPI journal article supplement (doi:10.3390/antibiotics12071122), 2023-06-28
Supplement: s1 [file s1]

Supplementary material

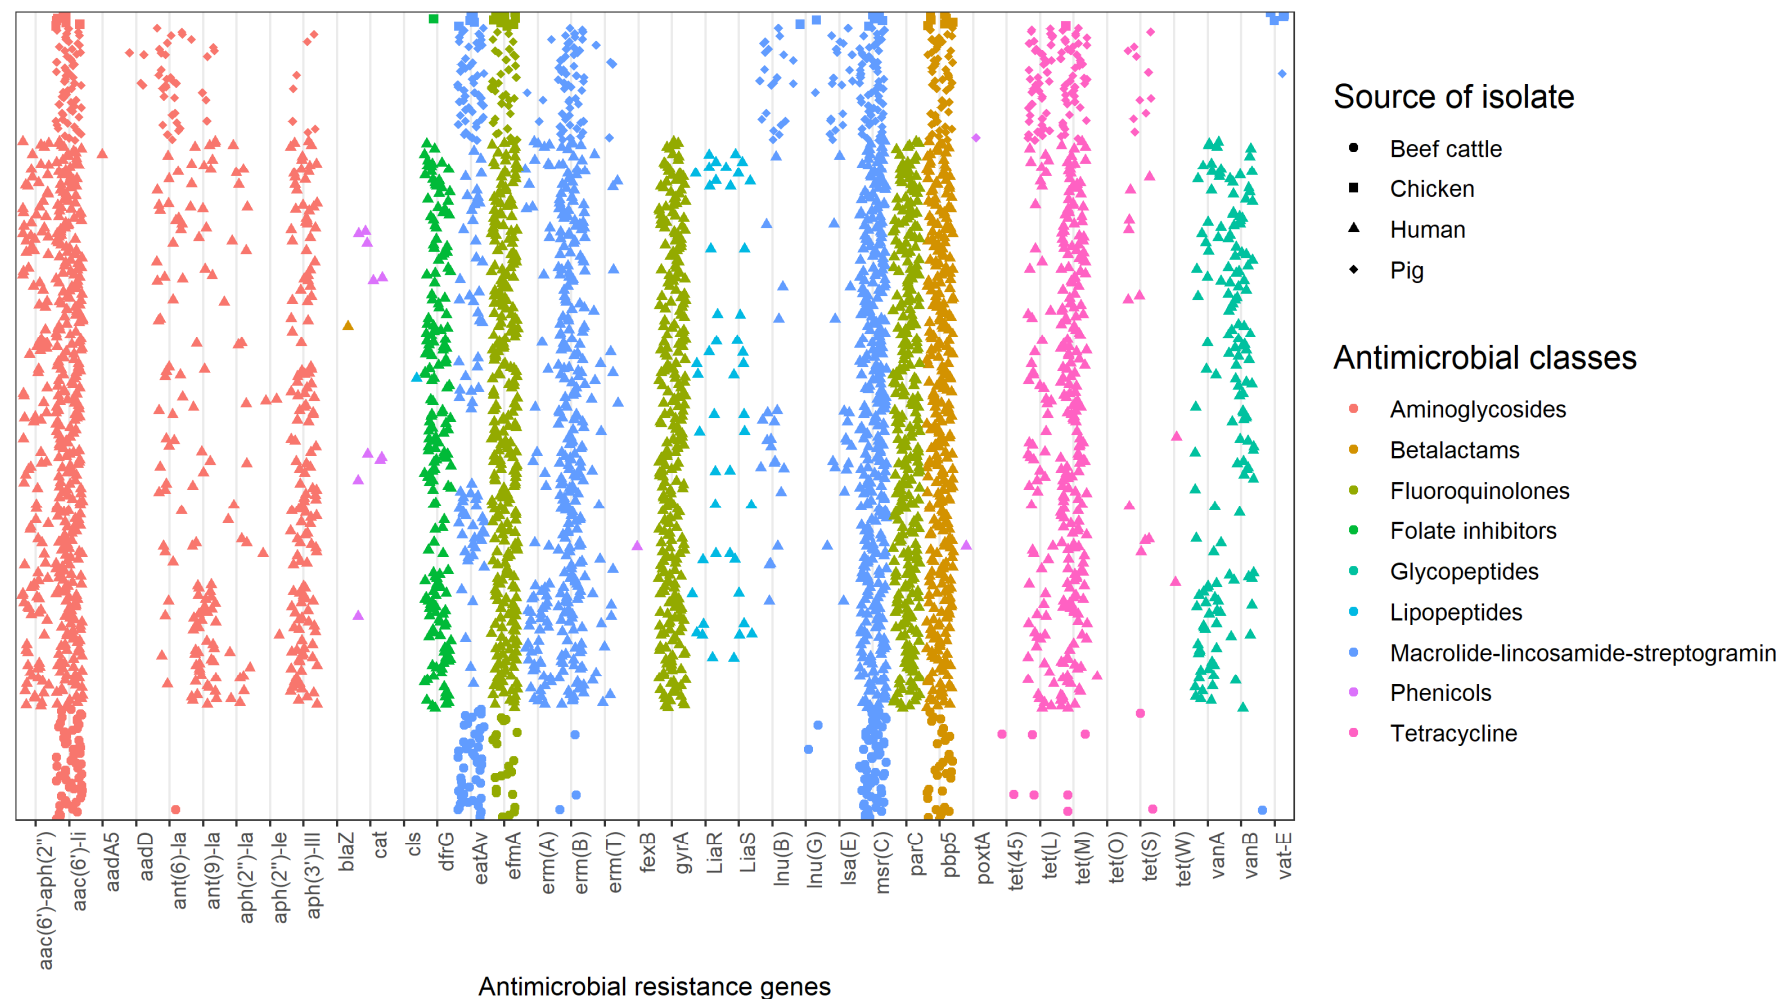

**Figure S1.** The frequency of antimicrobial resistance gene in *E. faecium* isolated from beef (n=59), pig (n=60), chicken (n=8) and human (n=302).

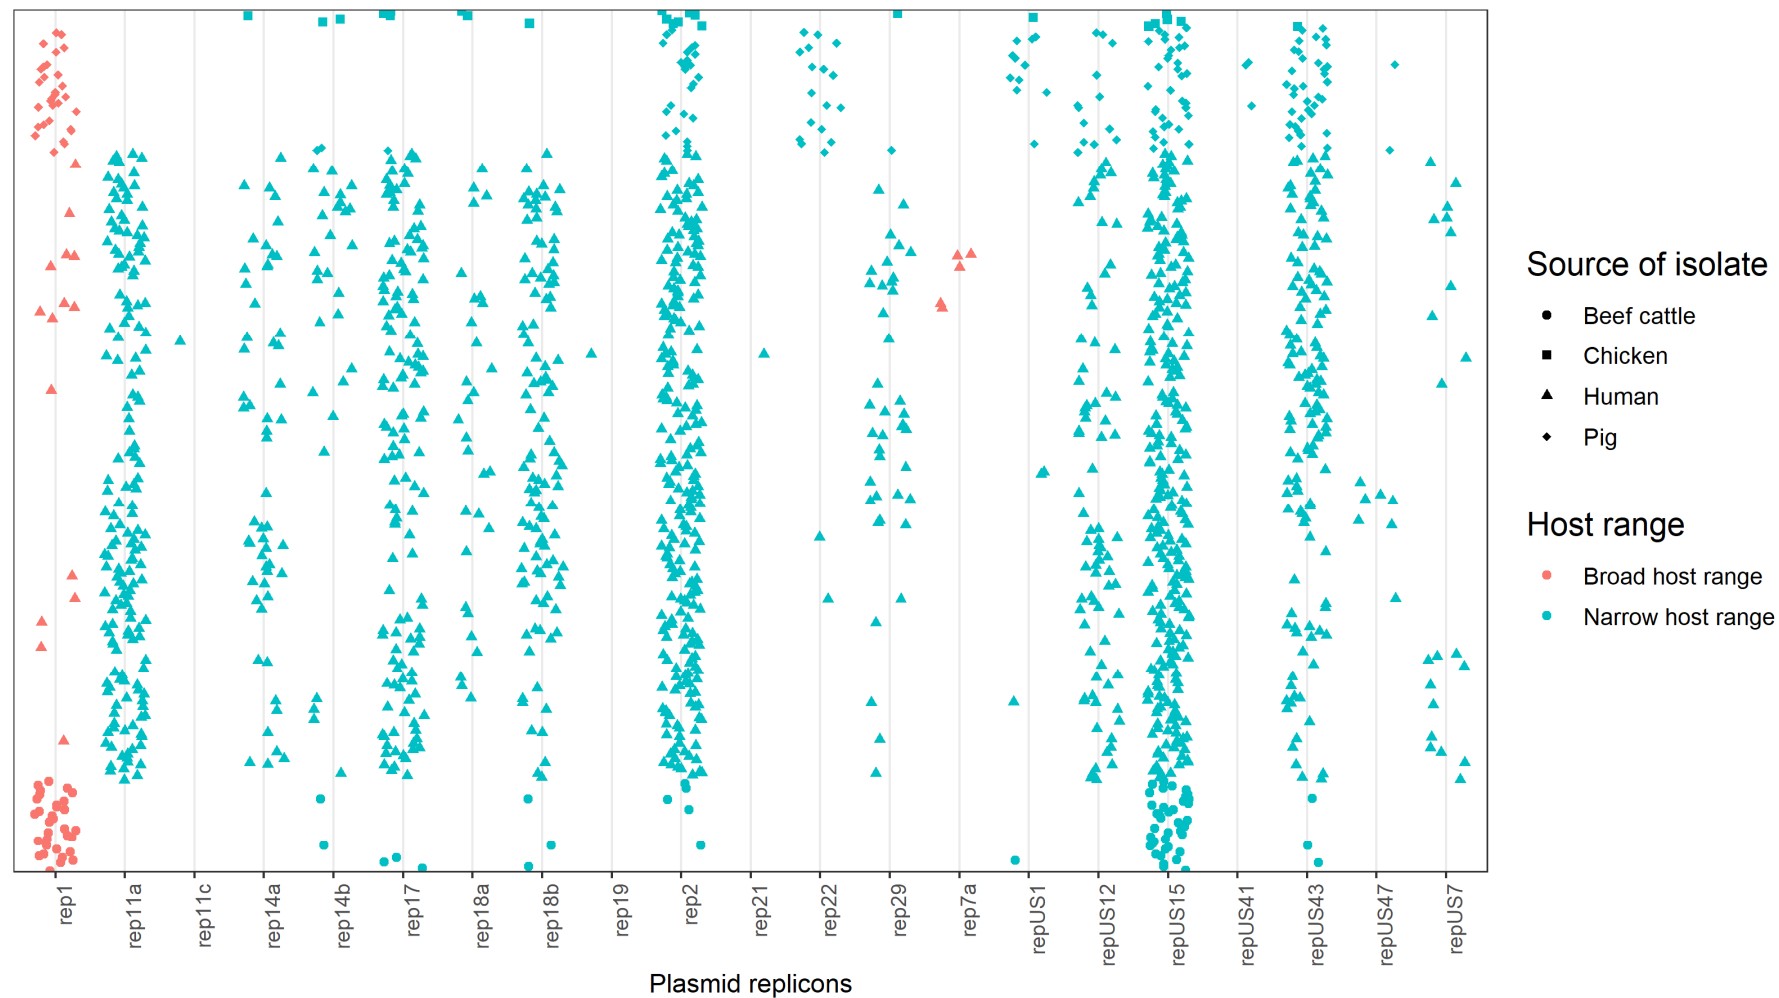

**Figure S2.** The frequency of plasmid replicons in *E. faecium* isolated from beef (n=59), pig (n=60), chicken (n=8) and human (n=302).

**Table S1.** Prevalence of antimicrobial resistance genes, plasmid replicons, and virulence genes in *E. faecium* (n=23) human Isolates mixed in animal isolate-dominated clades.

| Human isolates (n=23) | MLST | Antimicrobial resistance genes                                                                                    | Plasmid replicons                                 | Virulence genes    |
|-----------------------|------|-------------------------------------------------------------------------------------------------------------------|---------------------------------------------------|--------------------|
| SRR10040962           | 94   | <i>aac(6')-Ii, eatAv, msr(C)</i>                                                                                  | repUS15                                           | <i>acm, efaAfm</i> |
| SRR10041064           | 1051 | <i>aac(6')-Ii, eatAv, msr(C)</i>                                                                                  | rep1                                              | <i>acm, efaAfm</i> |
| SRR10041102           | 994  | <i>aac(6')-Ii, eatAv, msr(C)</i>                                                                                  | rep1, rep2, repUS15                               | <i>acm, efaAfm</i> |
| SRR10041153           | 1571 | <i>aac(6')-Ii, eatAv, msr(C)</i>                                                                                  | rep1, repUS15                                     | <i>acm, efaAfm</i> |
| SRR10041173           | 327  | <i>aac(6')-Ii, eatAv, msr(C)</i>                                                                                  |                                                   | <i>acm, efaAfm</i> |
| SRR10040882           | 855  | <i>aac(6')-Ii, efmA, msr(C)</i>                                                                                   | rep1, repUS15                                     | <i>acm, efaAfm</i> |
| SRR10040945           | 1565 | <i>aac(6')-Ii, eatAv, msr(C), pbp5</i>                                                                            | rep1, rep2, rep29, repUS15                        | <i>acm, efaAfm</i> |
| SRR10040968           | 800  | <i>aac(6')-Ii, eatAv, msr(C), pbp5</i>                                                                            | rep1, repUS15                                     | <i>acm, efaAfm</i> |
| SRR10040975           | 361  | <i>aac(6')-Ii, eatAv, efmA, msr(C)</i>                                                                            | repUS15                                           | <i>acm, efaAfm</i> |
| SRR10041049           | 717  | <i>aac(6')-Ii, eatAv, msr(C), pbp5</i>                                                                            | rep2                                              | <i>acm, efaAfm</i> |
| SRR10041177           | 1556 | <i>aac(6')-Ii, eatAv, msr(C), pbp5</i>                                                                            | rep1, repUS15                                     | <i>acm, efaAfm</i> |
| SRR10041104           | 22   | <i>aac(6')-Ii, efmA, msr(C), pbp5</i>                                                                             |                                                   | <i>acm, efaAfm</i> |
| SRR10041106           | 1532 | <i>aac(6')-Ii, efmA, msr(C), pbp5</i>                                                                             | rep1, repUS15                                     | <i>acm, efaAfm</i> |
| SRR10041117           | 22   | <i>aac(6')-Ii, efmA, msr(C), pbp5</i>                                                                             |                                                   | <i>acm, efaAfm</i> |
| SRR10040901           | 32   | <i>aac(6')-Ii, efmA, msr(C), pbp5</i>                                                                             |                                                   | <i>acm, efaAfm</i> |
| SRR10041023           | 1533 | <i>aac(6')-Ii, efmA, msr(C), pbp5</i>                                                                             | rep2, rep18a, repUS1                              | <i>acm, efaAfm</i> |
| SRR10041037           | 94   | <i>aac(6')-Ii, eatAv, efmA, msr(C), pbp5</i>                                                                      | repUS15                                           | <i>acm, efaAfm</i> |
| SRR10041066           | 12   | <i>aac(6')-Ii, eatAv, efmA, msr(C), pbp5</i>                                                                      |                                                   | <i>acm, efaAfm</i> |
| SRR10041086           | 1531 | <i>aac(6')-Ii, eatAv, efmA, msr(C), pbp5</i>                                                                      |                                                   | <i>acm, efaAfm</i> |
| SRR10041091           | 94   | <i>aac(6')-Ii, eatAv, efmA, msr(C), pbp5</i>                                                                      | rep11c, repUS15                                   | <i>acm, efaAfm</i> |
| SRR10040933           | 54   | <i>aac(6')-Ii, efmA, eatAv, msr(C), pbp5</i>                                                                      | rep1, repUS15                                     | <i>efaAfm</i>      |
| SRR10040988           | 1534 | <i>aac(6')-Ii, ant(6)-Ia, eatAv, efmA, erm(B), lnu(B), lsa(E), msr(C), pbp5, tet(L), tet(M)</i>                   | rep22, repUS12, repUS15, repUS43                  | <i>efaAfm</i>      |
| SRR10040956           | 1535 | <i>aac(6')-Ii, ant(6)-Ia, ant(9)-Ia, efmA, erm(A), erm(B), fexB, lnu(B), lsa(E), msr(C), pbp5, tet(L), tet(M)</i> | rep1, rep2, rep17, rep22, rep29, repUS12, repUS47 | <i>acm, efaAfm</i> |
